# Supplementary material
Source: Royal Society of Chemistry journal article supplement (doi:10.1039/d6nj00779a)
Supplement: d6nj00779a1.pdf [file d6nj00779a1.pdf]

## Tunable Band Alignment and Photovoltaic Potential in a Type-II $\text{Sb}_2\text{S}_3/\text{SnSe}_2$ Heterostructure

Sixuan Huang<sup>1</sup>, Li Fang<sup>1\*</sup>, GuoRui Rao<sup>1</sup>, GuangZhaoWang<sup>2</sup>, Hui Lv<sup>1,3</sup>

<sup>1</sup>National “111 Research Center” Microelectronics and Integrated Circuits, School of Science, Hubei University of Technology, Wuhan, 430068, PR China

<sup>2</sup>Key Laboratory of Extraordinary Bond Engineering and Advanced Materials Technology of Chongqing, School of Electronic Information Engineering, Yangtze Normal University, Chongqing, 408100, PR China

<sup>3</sup>Hubei University of Education, Wuhan, 430068, PR China

\*Corresponding author email: fangli@hbut.edu.cn

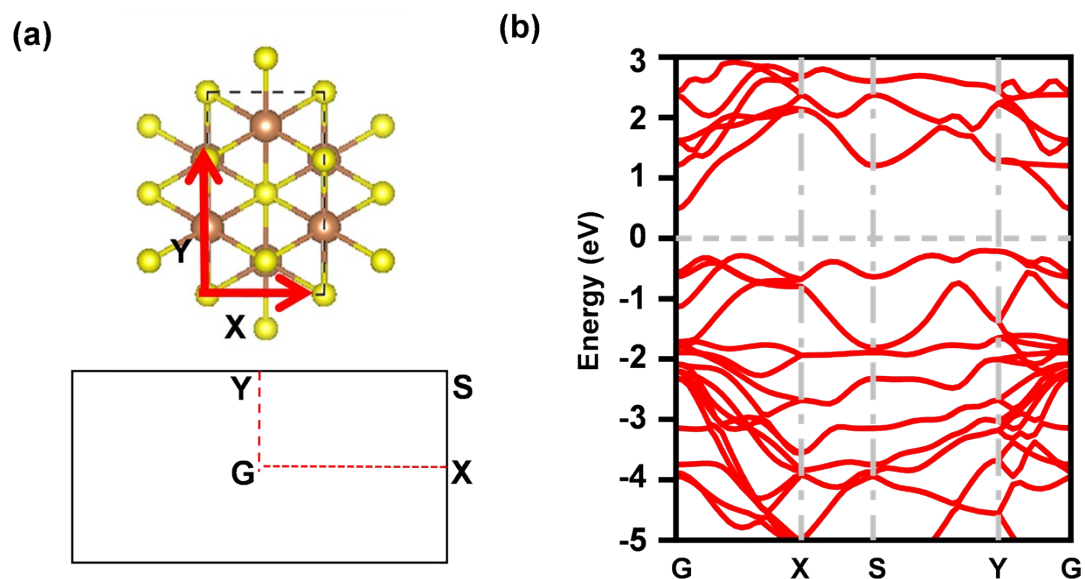

Figure S1 (a) Crystal structure of  $\text{Sb}_2\text{S}_3$  hexagonal cell and high-symmetry points in the Brillouin zone. (b) Band structure of the  $\text{Sb}_2\text{S}_3$  hexagonal cell.

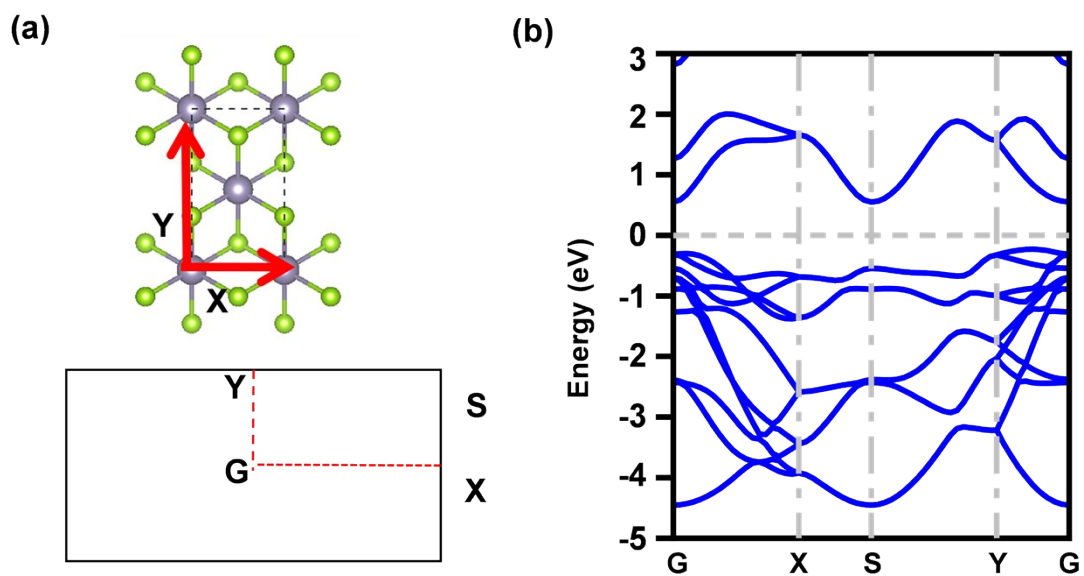

Figure S2 (a) Crystal structure of SnSe<sub>2</sub> hexagonal cell and high-symmetry points in the Brillouin zone. (b) Band structure of the SnSe<sub>2</sub> hexagonal cell.

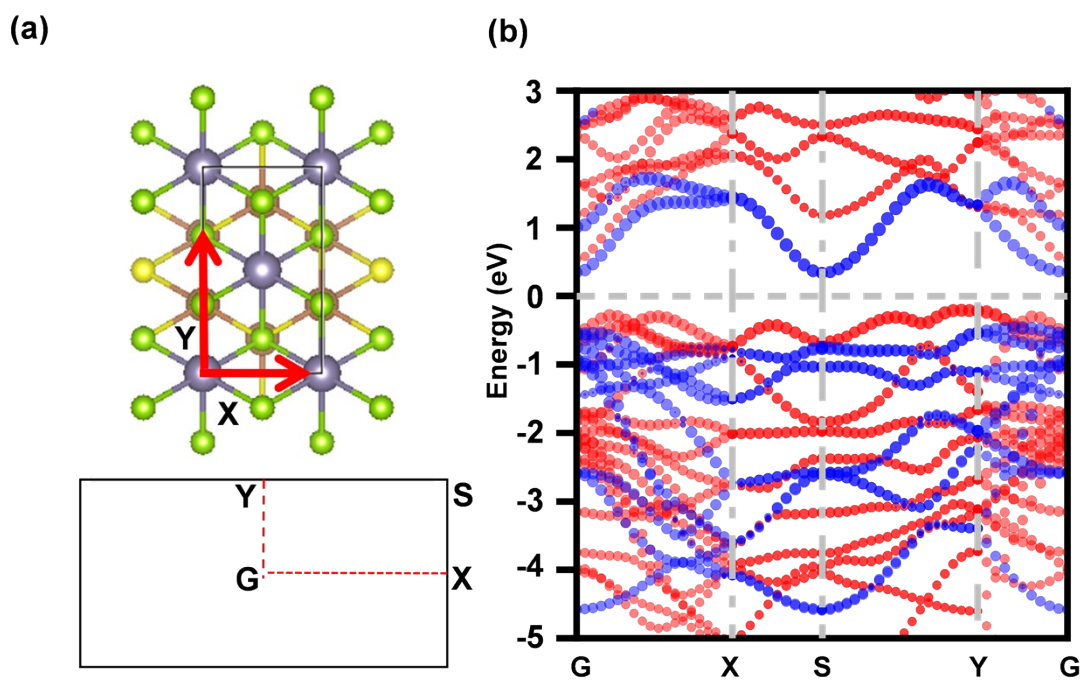

Figure S3 (a) Crystal structure of Sb<sub>2</sub>S<sub>3</sub>/SnSe<sub>2</sub> hexagonal cell and high-symmetry points in the Brillouin zone. (b) Band structure of the Sb<sub>2</sub>S<sub>3</sub>/SnSe<sub>2</sub> hexagonal cell.

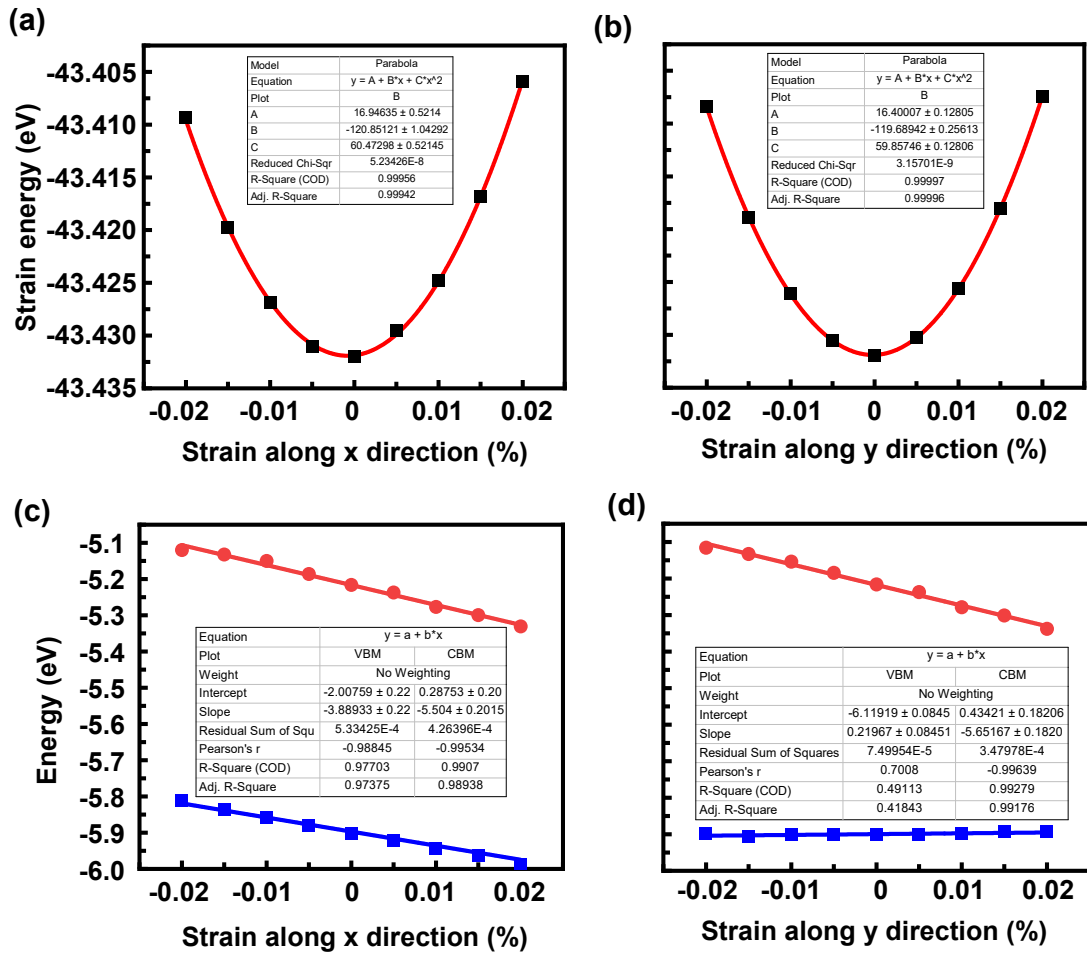

Figure S4 In-plane stiffness and deformation potential of the  $Sb_2S_3$  monolayer obtained from the PBE functional. (a) and (b) are the elastic moduli along the x and y directions, respectively. (c) and (d) are the corresponding deformation potentials for the CBM and VBM.

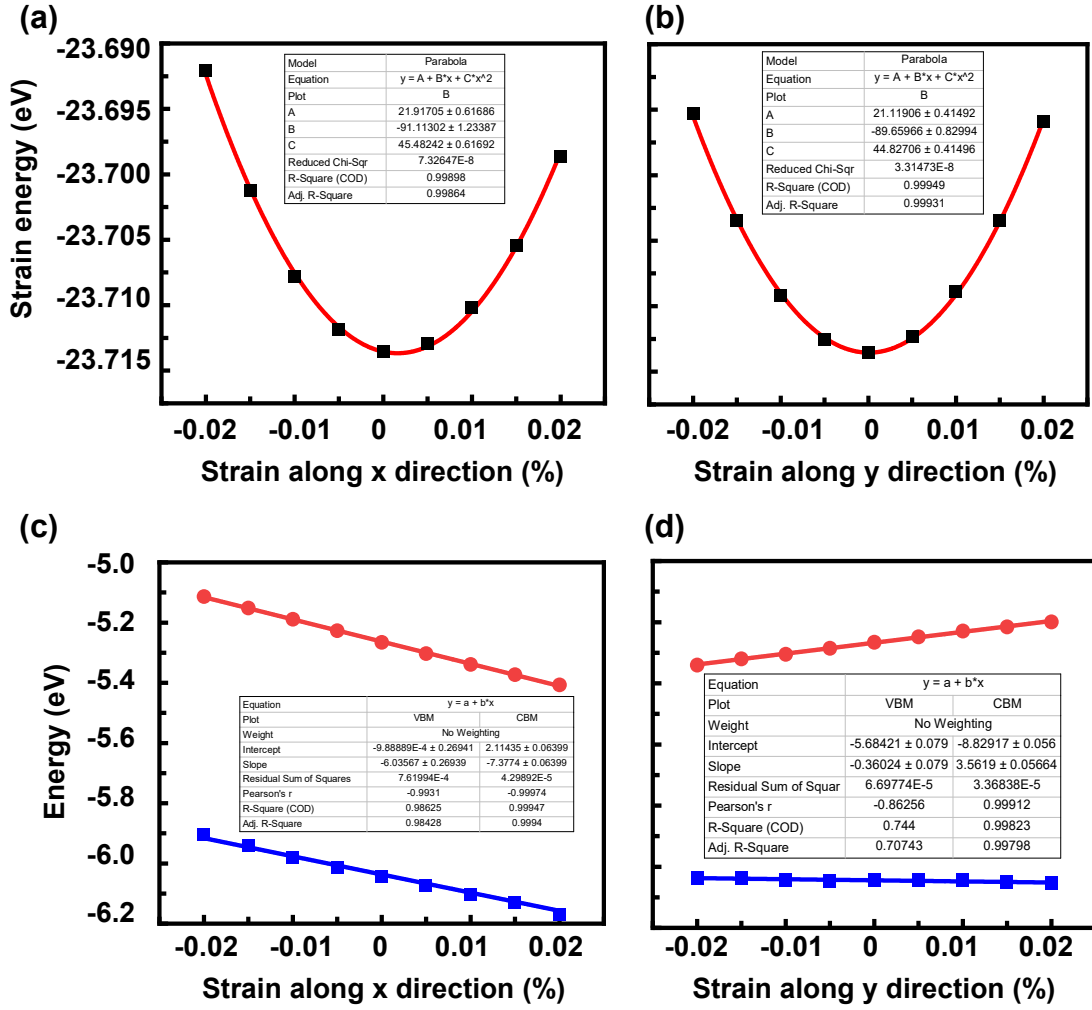

Figure S5 In-plane stiffness and deformation potential of the SnSe<sub>2</sub> monolayer obtained from the PBE functional. (a) and (b) are the elastic moduli along the x and y directions, respectively. (c) and (d) are the corresponding deformation potentials for the CBM and VBM.

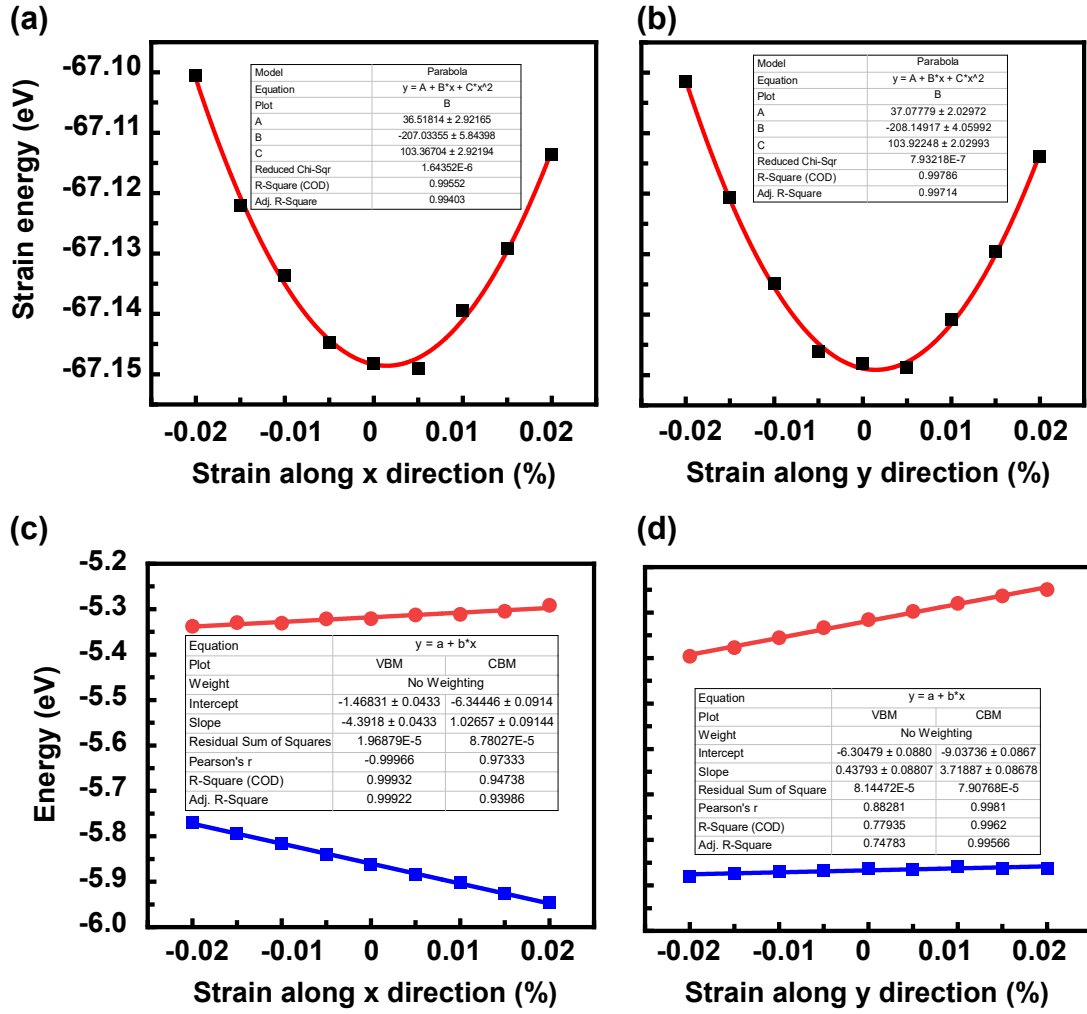

Figure S6 In-plane stiffness and deformation potential of the  $\text{Sb}_2\text{S}_3/\text{SnSe}_2$  heterostructure obtained from the PBE functional. (a) and (b) are the elastic moduli along the x and y directions, respectively. (c) and (d) are the corresponding deformation potentials for the CBM and VBM.

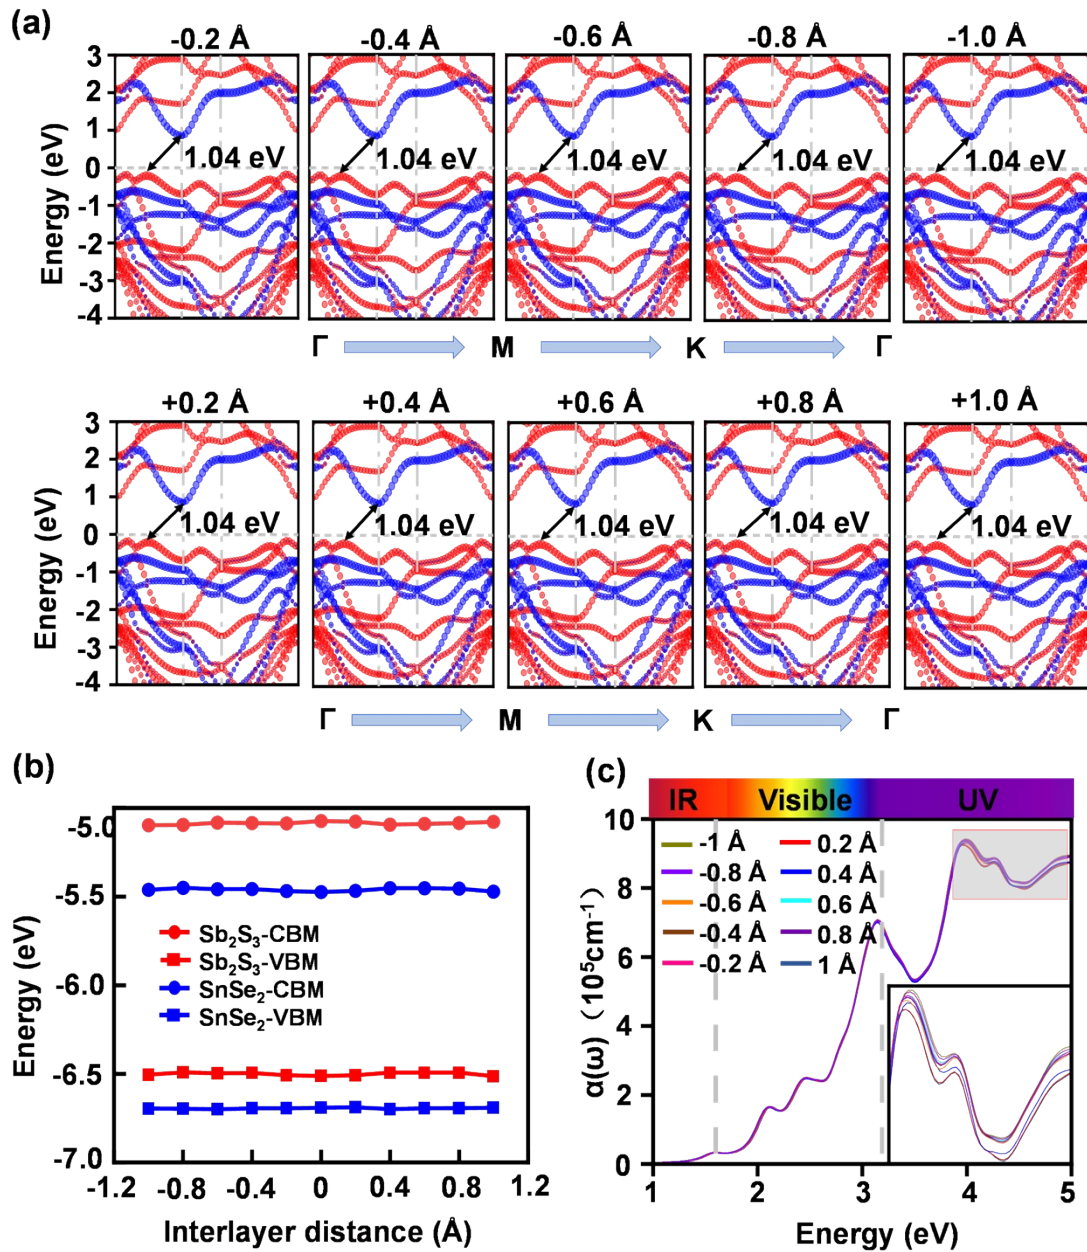

Figure S7. (a) Band structures of the Sb<sub>2</sub>S<sub>3</sub>/SnSe<sub>2</sub> heterostructure at different interlayer distances. Blue and red dots represent the projected states of SnSe<sub>2</sub> and Sb<sub>2</sub>S<sub>3</sub> layers, respectively. (b) Evolution of the CBM and VBM positions of the individual sublayers as the interlayer distance varies from -1 Å to 1 Å. (c) Optical absorption spectra of the heterostructure under different interlayer spacings.

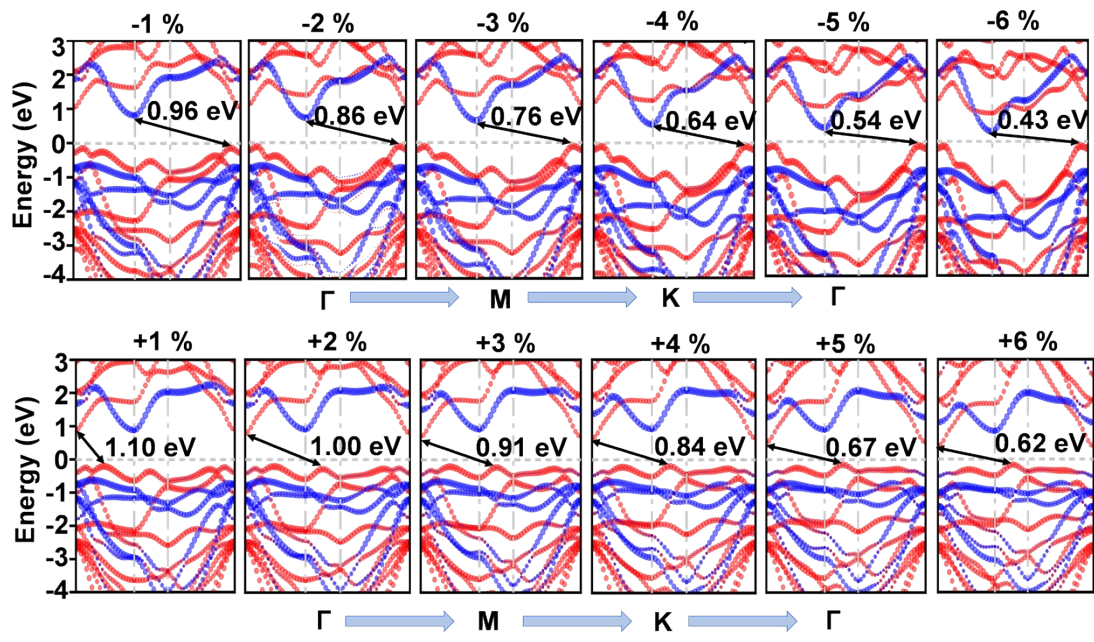

Figure S8 Band structures under different biaxial strains

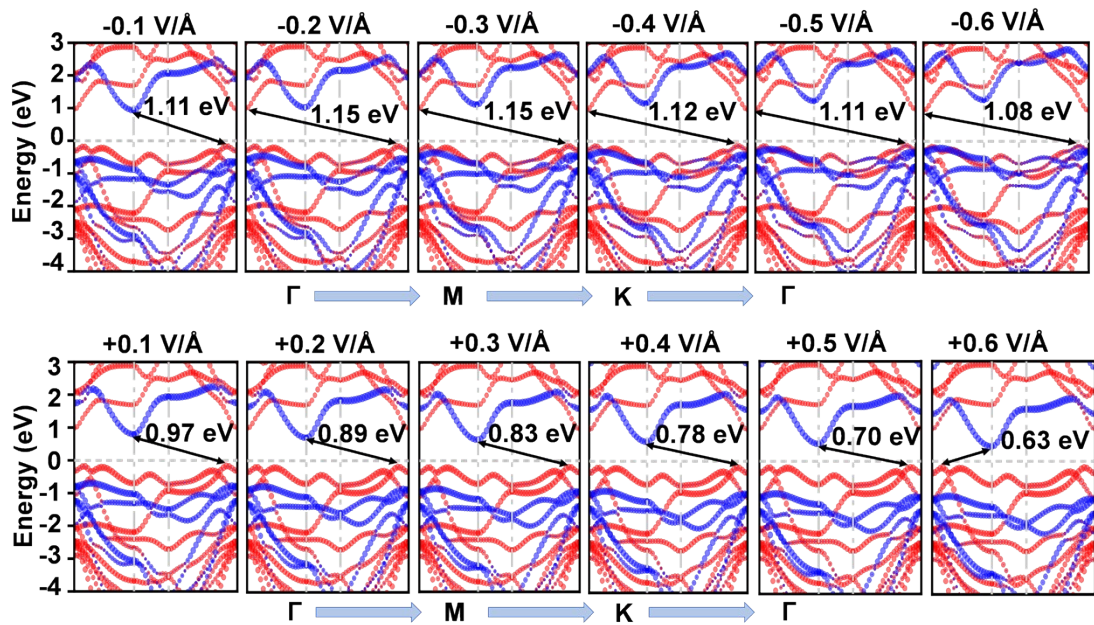

Figure S9 Band structures under different electric fields
